# Supplementary material
Source: bioRxiv or medRxiv preprint supplement (https://www.biorxiv.org/highwire/filestream/110476/field_highwire_adjunct_files/17/363523-4.pdf)

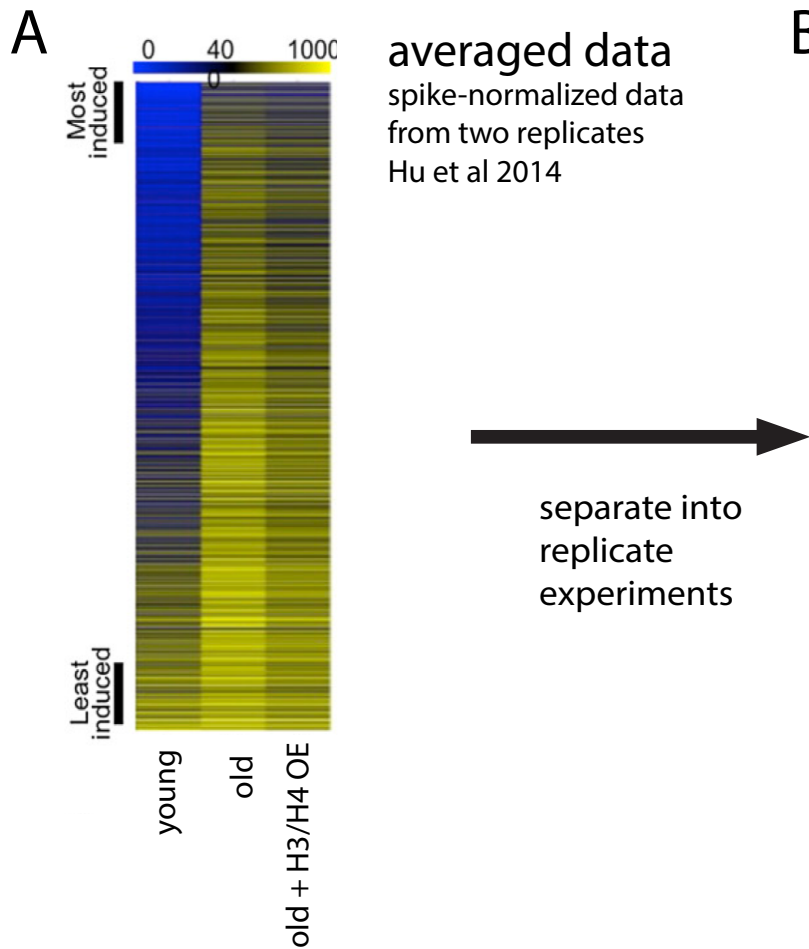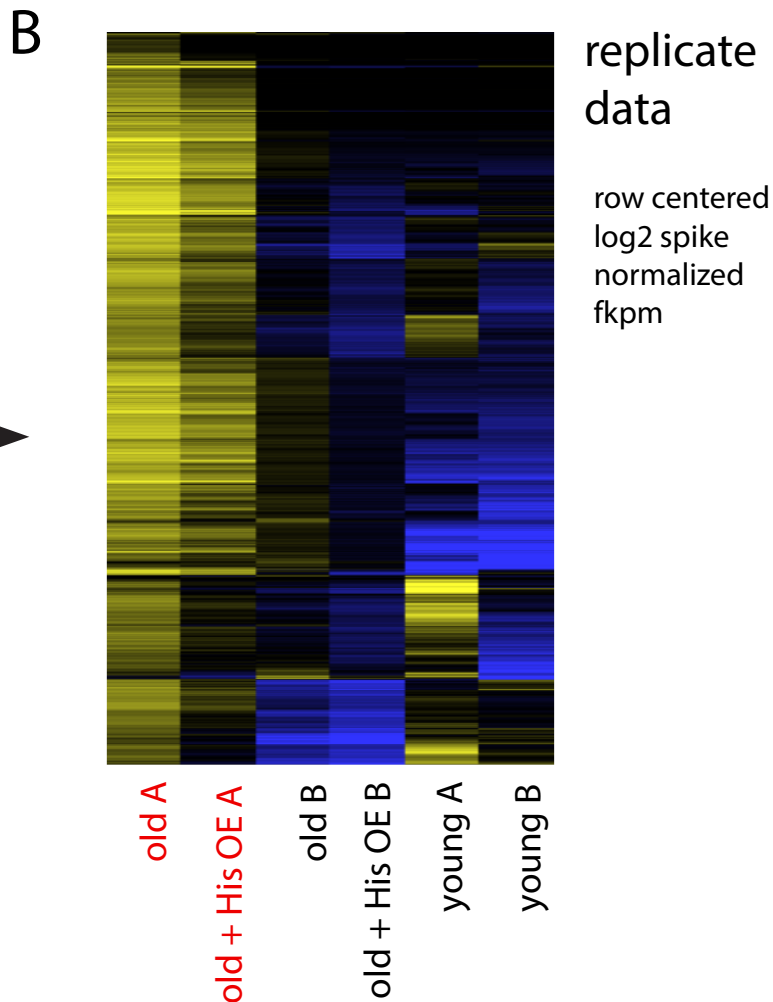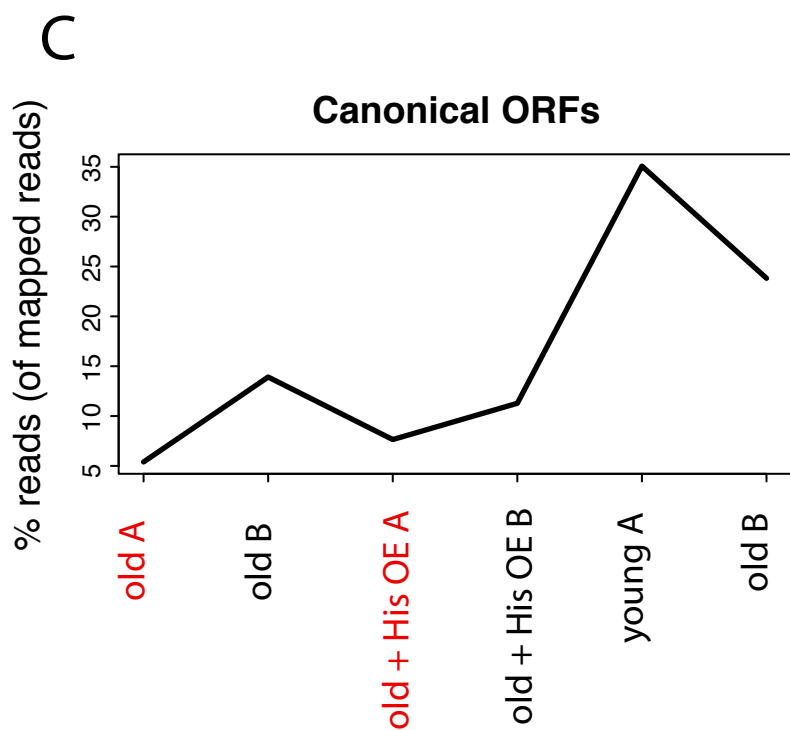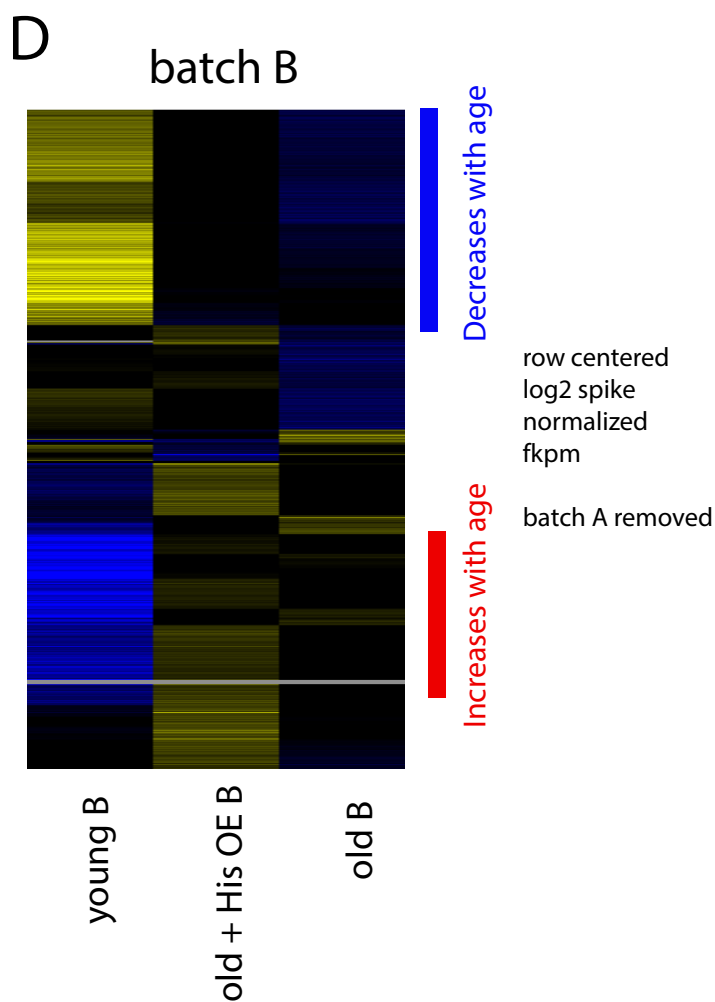

Supplement: Supplementary file [file 363523-4.pdf]
